# Supplementary material for: Synthesis of Eco-Friendly Biopolymer, Alginate-Chitosan Composite to Adsorb the Heavy Metals, Cd(II) and Pb(II) from Contaminated Effluents
Source: MDPI journal article supplement (doi:10.3390/ma14092189), 2021-04-24
Supplement: s1 [file s1]

# Synthesis of Eco-Friendly Biopolymer, Alginate-Chitosan Composite to Adsorb the Heavy Metals, Cd(II) and Pb(II) from Contaminated Effluents

Mohammed F. Hamza <sup>1,2,\*</sup>, Nora A. Hamad <sup>3</sup>, Doaa M. Hamad <sup>3</sup>, Mahmoud S. Khalafalla <sup>2</sup>,  
Adel A.-H. Abdel-Rahman <sup>3</sup>, Ibrahim F. Zeid <sup>3</sup>, Yuezhou Wei <sup>1,4,\*</sup>, Mahmoud M. Hessien <sup>5</sup>, Amr Fouda <sup>6</sup>  
and Waheed M. Salem <sup>7</sup>

<sup>1</sup> Guangxi Key Laboratory of Processing for Non-ferrous Metals and Featured Data, School of Resources, Environment and Data, Guangxi University, Nanning 530004, China

<sup>2</sup> Nuclear Materials Authority, P.O. Box. 530, El-Maadi, Cairo 11381, Egypt; mahmoudsayed24@yahoo.com

<sup>3</sup> Department of Organic Chemistry, Faculty of Science, Menoufia University, Shebine El-Koam 00123, Egypt; nhamad059@gmail.com (N.A.H.); dodyhamad95@gmail.com (D.M.H.); adelnassar63@yahoo.com (A.A.-H.A.-R.); ibrahimzeid296@gmail.com (I.F.Z.)

<sup>4</sup> School of Nuclear Science and Engineering, Shanghai Jiao Tong University, Shanghai 200240, China

<sup>5</sup> Department of Chemistry, College of Science, Taif University, P.O. Box. 11099, Taif 21974, Saudi Arabia; m.hessien@tu.edu.sa

<sup>6</sup> Botany and Microbiology Department, Faculty of Science, AL-Azhar University, Cairo 11884, Egypt; amr\_fh83@azhar.edu.eg

<sup>7</sup> Medical Laboratories Department, Faculty of Applied Health Science technology, Menoufia University, Shebine El-Koam 32511, Egypt; waheedsalem1979@gmail.com

\* Correspondence: m\_fouda21@hotmail.com (M.F.H.); yzwei@gxu.edu.cn (Y.W.)

**Table S1.** Maximum contaminant limits (MCL) and Recommended Maximum Concentrations (RMC) of some heavy metals in drinking water, irrigation water, and livestock drinking water.

| Element  | MCLs (mg L <sup>-1</sup> ) |           |         | RMC (mg L <sup>-1</sup> ) |                          |
|----------|----------------------------|-----------|---------|---------------------------|--------------------------|
|          | EU [1]                     | USEPA [2] | WHO [3] | Irrigation Water          | Livestock Drinking Water |
| Cadmium  | 0.005                      | 0.005     | 0.003   | 0.01                      | 0.05                     |
| Lead     | 0.1                        | 0.015     | 0.005   | 5.0                       | 0.1                      |
| Copper   | –                          | 1.3       | 2.0     | 0.20                      | 0.5                      |
| Zinc     | –                          | 5.0       | 5.0     | 2.0                       | 24.0                     |
| Nickel   | –                          | –         | 0.07    | 0.20                      | –                        |
| Aluminum | –                          | 0.2       | –       | 5.0                       | 5.0                      |
| Iron     | –                          | 0.3       | –       | 5.0                       | –                        |

**Table S2.** Uptake kinetics modeling—PFORE (pseudo-first-order rate equation), PSORE (pseudo-second-order rate equation), and RIDE (resistance to intraparticle diffusion equation—Crank equation).

| Model     | Equation                                                                         | Parameters                          |                                                  |
|-----------|----------------------------------------------------------------------------------|-------------------------------------|--------------------------------------------------|
| PFORE [4] | $q(t) = q_{eq,1}(1 - e^{-k_1 t})$                                                | $q_{eq,1}$<br>(mg g <sup>-1</sup> ) | $k_1$<br>(min <sup>-1</sup> )                    |
| PSORE [4] | $q(t) = \frac{q_{eq,2}^2 \times k_2 \times t}{1 + q_{eq,2} \times k_2 \times t}$ | $q_{eq,2}$<br>(mg g <sup>-1</sup> ) | $k_2$<br>(L mg <sup>-1</sup> min <sup>-1</sup> ) |

**Table S3.** Sorption isotherm modeling [5,6].

| Model      | Langmuir                                                             | Freundlich                                                     | Sips                                                                                 |
|------------|----------------------------------------------------------------------|----------------------------------------------------------------|--------------------------------------------------------------------------------------|
| Equation   | $q = \frac{q_{m,L} \times b_L \times C_{eq}}{1 + b_L \times C_{eq}}$ | $q = k_F C_{eq}^{1/n}$                                         | $q = \frac{q_{m,S} \times b_S \times C_{eq}^{1/n_S}}{1 + b_S \times C_{eq}^{1/n_S}}$ |
| Parameters | $q_{m,L}$<br>( $\text{mg g}^{-1}$ )*                                 | $k_F$<br>( $\text{mg}^{1-1/n} \text{g}^{-1} \text{L}^{-1/n}$ ) | $q_{m,S}$<br>( $\text{mmol g}^{-1}$ )*                                               |
|            | $b_L$<br>( $\text{L mg}^{-1}$ )**                                    | $n$<br>(dimensionless)                                         | $b_S$<br>( $\text{L mg}^{-1}$ )**                                                    |
|            | –                                                                    | –                                                              | $n_S$<br>(dimensionless)                                                             |
|            |                                                                      |                                                                |                                                                                      |

\* Sorption capacity at saturation of the monolayer; \*\* Affinity coefficient

Akaike Information Criterion, AIC [7]:

$$AIC = N \ln \left( \frac{\sum_{i=0}^N (y_{i,exp.} - y_{i,model})^2}{N} \right) + 2N_p + \frac{2N_p(N_p + 1)}{N - N_p - 1} \quad (1)$$

where N is the number of experimental points,  $N_p$  is the number of model parameters,  $y_{i,exp.}$  and  $y_{i,model}$  are the experimental and calculated values of the tested variable

**Table S4.** Maximum contaminant limits (MCL) of some heavy metals in drinking water.

| Metal | Co    | MCL*<br>( $\text{mg L}^{-1}$ ) | Co/MCL ratio |
|-------|-------|--------------------------------|--------------|
| Cu    | 6.403 | 2                              | 3.2015       |
| Hg    | 0.83  | 0.002                          | 415          |
| Fe    | 165.4 | 0.3                            | 551.33333    |
| Al    | 125.8 | 0.2                            | 629          |
| Zn    | 7.39  | 5                              | 1.478        |
| Cd    | 1.96  | 0.003                          | 653.33333    |
| Pb    | 2.03  | 0.01                           | 203          |
| Ni    | 2.18  | 0.07                           | 31.142857    |

\*Maximum contaminant limits (MCL) according to WHO, while Al and Fe are assigned according to the US.EPA

**Table S5a.** XPS analysis (HRES XPS peaks) of C 1s, N 1s, O 1s, Cl 2p, M (M = Cd and Pb) for CA#3 sorbent before and after metal sorption.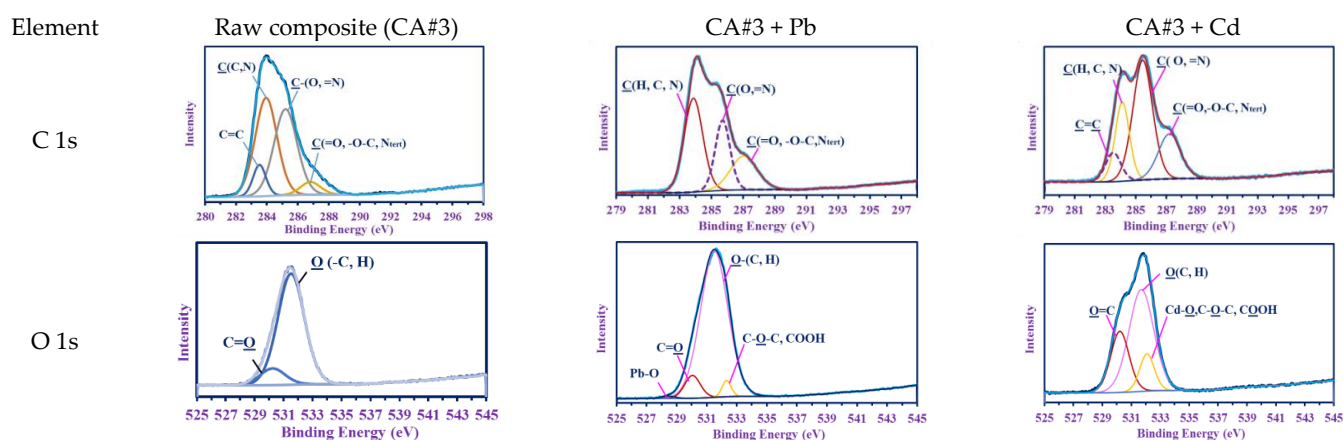

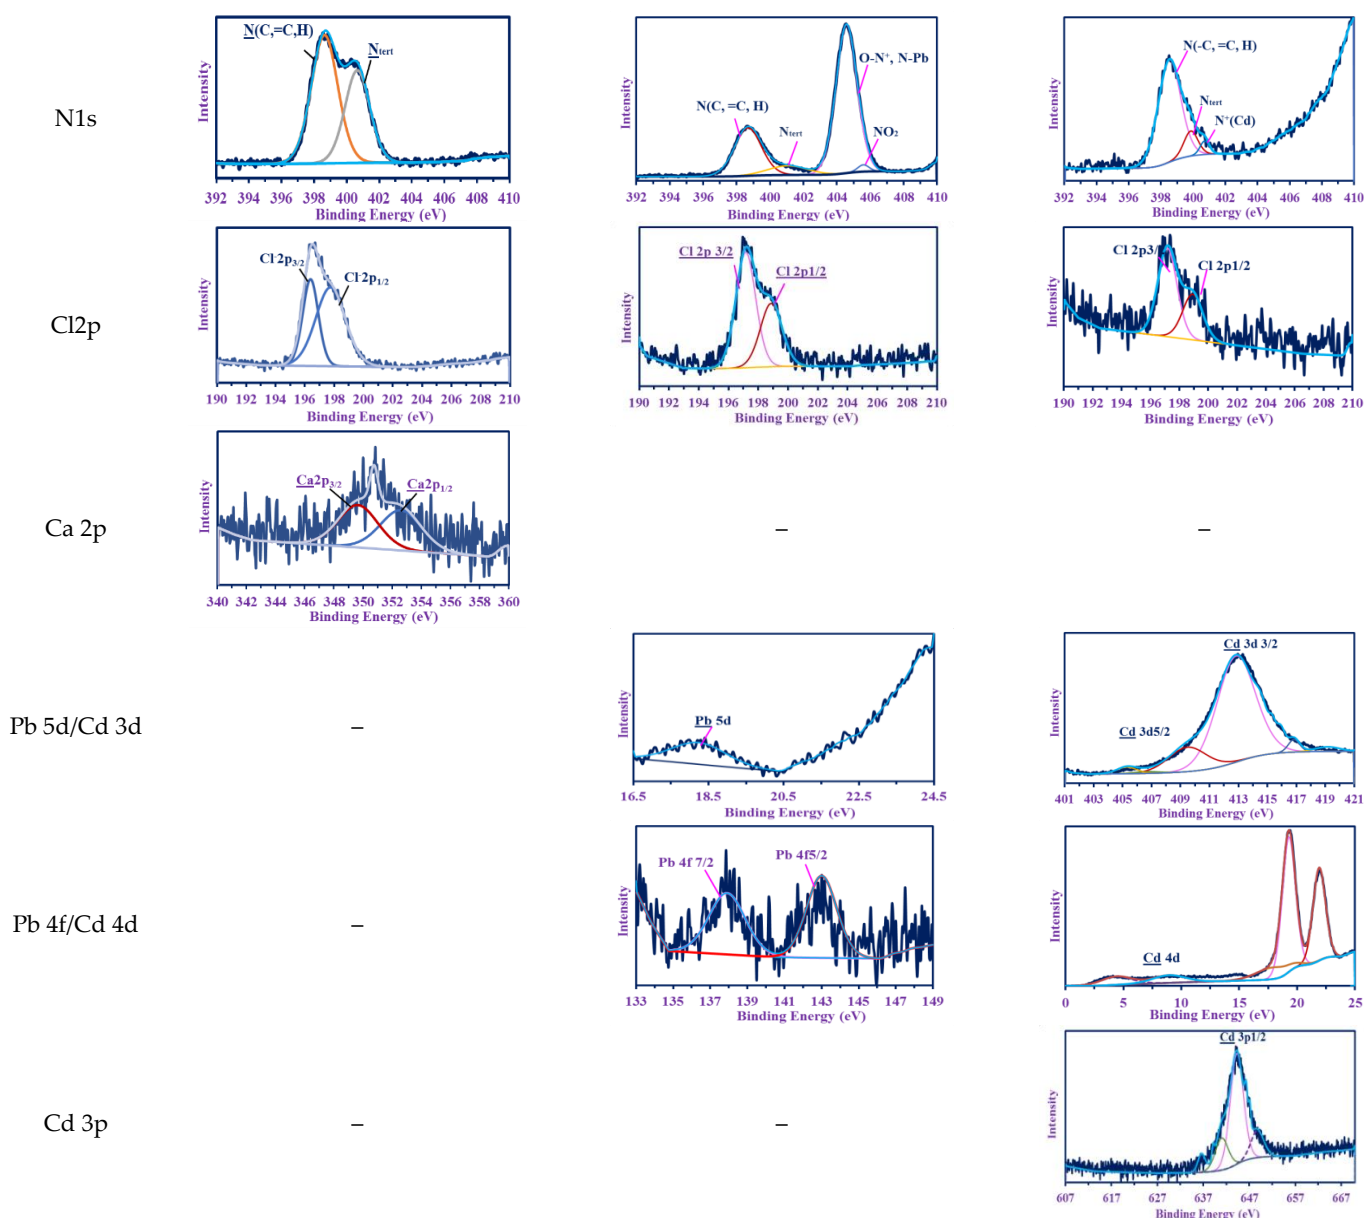

**Table S5b.** Assignment peaks, BEs, FWHE, and atomic fractions (AF, %) of C 1s, N 1s, O 1s, Cl 2p, M (M=Cd and Pb) for CA#3 sorbent before and after metal sorption.

| Element/<br>Transition peak | Pb     |      |       | Cd     |      |       |        |      |       |
|-----------------------------|--------|------|-------|--------|------|-------|--------|------|-------|
|                             | BE     | FWHE | AF%   | BE     | FWHE | AF%   | BE     | FWHE | AF%   |
| C 1s                        | 284.35 | 1.67 | 44.56 | 284.17 | 0.86 | 31.14 | 284.12 | 1.1  | 22.81 |
|                             | 285.82 | 1.76 | 40.49 | 285.14 | 0.84 | 30.96 | 285.46 | 1.52 | 47.76 |
|                             | 286.81 | 1.52 | 8.06  | 287.05 | 1.98 | 37.9  | 287.21 | 1.72 | 20.28 |
|                             | 283.93 | 1.91 | 6.89  | —      | —    | —     | 283.53 | 1.2  | 9.14  |
| O 1s                        | 530.24 | 2.05 | 12.47 | 530.05 | 1.23 | 7.92  | 530.21 | 1.5  | 26.83 |
|                             | 531.51 | 2.16 | 87.53 | 531.5  | 2.13 | 88.12 | 531.69 | 2.02 | 60.14 |
|                             | —      | —    | —     | 532.32 | 0.7  | 3.22  | 532.09 | 1.2  | 13.03 |
|                             | —      | —    | —     | 528.47 | 1.09 | 0.73  | —      | —    | —     |
| N 1s                        | 398.64 | 1.92 | 59.63 | 398.68 | 1.9  | 26.61 | 398.51 | 1.64 | 82.87 |
|                             | 400.66 | 1.8  | 40.37 | 401.06 | 2.81 | 7.58  | 399.85 | 1.03 | 12.67 |
|                             | —      | —    | —     | 404.57 | 1.47 | 64.2  | 400.71 | 0.67 | 4.46  |
|                             | —      | —    | —     | 405.59 | 0.8  | 1.61  | —      | —    | —     |

|       |        |      |       |        |       |       |        |      |       |           |
|-------|--------|------|-------|--------|-------|-------|--------|------|-------|-----------|
| Ca 2p | 349.64 | 3.25 | 50.83 | –      | –     | –     | –      | –    | –     | Ca 2p 3/2 |
|       | 352.6  | 3.35 | 49.17 | –      | –     | –     | –      | –    | –     | Ca 2p 1/2 |
| Cl 2p | 196.59 | 1.26 | 36.66 | 197.05 | 1.57  | 62.41 | 197.07 | 1.57 | 64.84 | Cl 2p3/2  |
|       | 197.75 | 2.39 | 63.34 | 198.56 | 1.73  | 37.59 | 198.63 | 1.66 | 35.16 | Cl 2p 1/2 |
| Cd 3d | –      | –    | –     | –      | –     | –     | 405.29 | 1.65 | 4.38  | Cd 3d5/2  |
|       |        |      |       |        |       |       | 409.48 | 3.09 | 20.77 |           |
|       |        |      |       |        |       |       | 412.84 | 3.12 | 69.89 | Cd 3d1/2  |
|       |        |      |       |        |       |       | 416.83 | 0.94 | 4.96  |           |
| Cd 3p | –      | –    | –     | –      | –     | –     | 636.61 | 1.86 | 5.39  | Cd 3p1/2  |
|       |        |      |       |        |       |       | 641.01 | 3.33 | 18.97 |           |
|       |        |      |       |        |       |       | 644.28 | 3.36 | 59.03 |           |
|       |        |      |       |        |       |       | 648.74 | 3.33 | 16.61 |           |
| Cd 4d | –      | –    | –     | –      | –     | –     | 4.43   | 3.08 | 6.63  | Cd 4d     |
|       |        |      |       |        |       |       | 8.95   | 3.36 | 6.65  |           |
|       |        |      |       |        |       |       | 17.89  | 3.36 | 10.11 | –         |
|       |        |      |       |        |       |       | 19.29  | 1.34 | 46.34 | –         |
|       |        |      |       |        |       |       | 21.91  | 1.27 | 30.26 | –         |
| Pb 5d | –      | –    | 18.23 | 1.73   | 100   | –     | –      | –    | –     | Pb 5d     |
| Pb 4f | –      | –    | 143   | 1.92   | 52.35 | –     | –      | –    | –     | Pb 4f5/2  |
|       | –      | –    | 138.1 | 2.31   | 47.65 | –     | –      | –    | –     | Pb 4f7/2  |

Table S6. EA of CA#2, CA#3, and CA#4 sorbents for C, N, O, and H%.

| Sorbent | C     | H    | O     | O (mmol) | N    | N (mmol) |
|---------|-------|------|-------|----------|------|----------|
| CA#2    | 32.94 | 4.74 | 29.82 | 18.64    | 6.33 | 4.52     |
| CA#3    | 35.9  | 4.49 | 33.58 | 20.99    | 5.22 | 3.73     |
| CA#4    | 37.87 | 4.32 | 38.09 | 23.80    | 4.19 | 2.99     |

Table S7. Ionic properties of selected metals.

| Parameter                                                          | Pb(II)     | Cd(II)          |
|--------------------------------------------------------------------|------------|-----------------|
| Ionic radius (Å) of hydrated species                               | 1.20 Å [8] | 0.95–0.96 Å [9] |
| Diffusivity in water ( $\times 10^5 \text{ cm}^2 \text{ s}^{-1}$ ) | 0.939 [10] | 0.719 [11]      |
| Softness                                                           | +0.41 [11] | +0.58 [11]      |

Table S8. Selectivity Coefficient (SC),  $K_d$  values,  $C_o$ ,  $C_f$  and  $q_{eq}$  of Cd and Pb in equi-molar solution containing Al, Ca, and Mg as a function of pH.

| Elements | pHeq | $C_o \text{ mmol L}^{-1}$ | $C_f \text{ mmol g}^{-1}$ | $q_{eq} \text{ mmol g}^{-1}$ | $K_d$ | Selectivity Coefficient |       |
|----------|------|---------------------------|---------------------------|------------------------------|-------|-------------------------|-------|
|          |      |                           |                           |                              |       | Cd/M                    | Pb/M  |
| Al       | 2.43 | 1.105                     | 1.038                     | 0.079                        | 0.077 | 0.969                   | 0.681 |
|          | 3.68 | 1.105                     | 1.037                     | 0.08                         | 0.078 | 5.552                   | 3.148 |
|          | 4.22 | 1.105                     | 1.028                     | 0.091                        | 0.089 | 25.8                    | 8.198 |
|          | 4.76 | 1.105                     | 1.014                     | 0.108                        | 0.106 | 22.65                   | 6.31  |
| Ca       | 2.43 | 1.042                     | 0.998                     | 0.052                        | 0.053 | 1.411                   | 0.991 |
|          | 3.68 | 1.042                     | 0.99                      | 0.063                        | 0.063 | 6.7912                  | 3.851 |
|          | 4.22 | 1.042                     | 0.951                     | 0.109                        | 0.114 | 19.948                  | 6.339 |
|          | 4.76 | 1.042                     | 0.937                     | 0.126                        | 0.135 | 17.892                  | 4.983 |
| Mg       | 2.43 | 1.061                     | 1.035                     | 0.031                        | 0.03  | 2.496                   | 1.753 |
|          | 3.68 | 1.061                     | 1.003                     | 0.069                        | 0.069 | 6.200                   | 3.516 |
|          | 4.22 | 1.061                     | 0.965                     | 0.115                        | 0.119 | 19.229                  | 6.109 |
|          | 4.76 | 1.061                     | 0.921                     | 0.1673                       | 0.182 | 13.28                   | 3.699 |
| Cd       | 2.43 | 1.098                     | 1.034                     | 0.0767                       | 0.074 | –                       | 0.702 |
|          | 3.68 | 1.098                     | 0.807                     | 0.348                        | 0.431 | –                       | 0.567 |
|          | 4.22 | 1.098                     | 0.377                     | 0.862                        | 2.287 | –                       | 0.318 |
|          | 4.76 | 1.098                     | 0.364                     | 0.878                        | 2.412 | –                       | 0.279 |
|          | 2.43 | 1.051                     | 1.005                     | 0.052                        | 0.052 | 1.424                   | –     |

|    |      |       |       |       |       |       |   |
|----|------|-------|-------|-------|-------|-------|---|
| Pb | 3.68 | 1.051 | 0.873 | 0.213 | 0.244 | 1.764 | – |
|    | 4.22 | 1.051 | 0.653 | 0.475 | 0.727 | 3.147 | – |
|    | 4.76 | 1.051 | 0.673 | 0.452 | 0.672 | 3.59  | – |

**Table S9.** Comparison of the metal concentration with the MCL (mg L<sup>-1</sup>) according to drinking water guides and the removal efficiency at different pH values.

| pH   | Metal | Co<br>(mg L <sup>-1</sup> ) | Ceq<br>(mg L <sup>-1</sup> ) | MCL<br>(mg L <sup>-1</sup> ) | Removal Eff. (%) | C <sub>0</sub> /MCL Ratio | C <sub>eq</sub> /MCL Ratio |
|------|-------|-----------------------------|------------------------------|------------------------------|------------------|---------------------------|----------------------------|
| 2    | Cu    | 6.403                       | 5.12                         | 2                            | 20.04            | 3.20                      | 2.56                       |
|      | Hg    | 0.83                        | 0.384                        | 0.002                        | 53.74            | 415                       | 192                        |
|      | Fe    | 165.4                       | 73                           | 0.3                          | 55.87            | 551.33                    | 243.33                     |
|      | Al    | 125.8                       | 54.8                         | 0.2                          | 56.44            | 629                       | 274                        |
|      | Zn    | 7.39                        | 6.91                         | 5                            | 6.49             | 1.48                      | 1.38                       |
|      | Cd    | 1.96                        | 1.81                         | 0.003                        | 7.65             | 653.33                    | 603.33                     |
|      | Pb    | 2.03                        | 1.83                         | 0.01                         | 9.85             | 203                       | 183                        |
|      | Ni    | 2.18                        | 2.081                        | 0.07                         | 4.54             | 31.14                     | 29.73                      |
|      |       |                             |                              |                              |                  |                           |                            |
| 4.04 | Cu    | 6.403                       | 1.98                         | 2                            | 69.08            | 3.20                      | 0.99                       |
|      | Hg    | 0.83                        | 0.194                        | 0.002                        | 76.63            | 415                       | 97                         |
|      | Fe    | 165.4                       | 10.95                        | 0.3                          | 93.38            | 551.33                    | 36.5                       |
|      | Al    | 125.8                       | 35.9                         | 0.2                          | 71.46            | 629                       | 179.5                      |
|      | Zn    | 7.39                        | 3.35                         | 5                            | 54.67            | 1.48                      | 0.67                       |
|      | Cd    | 1.96                        | 0.26                         | 0.003                        | 86.73            | 653.33                    | 86.67                      |
|      | Pb    | 2.03                        | 0.56                         | 0.01                         | 72.41            | 203                       | 56                         |
|      | Ni    | 2.18                        | 1.07                         | 0.07                         | 50.92            | 31.14                     | 15.29                      |
|      |       |                             |                              |                              |                  |                           |                            |
| 5.8  | Cu    | 6.403                       | 0.93                         | 2                            | 85.48            | 3.20                      | 0.46                       |
|      | Hg    | 0.83                        | 0.014                        | 0.002                        | 98.31            | 415                       | 7                          |
|      | Fe    | 165.4                       | 5.05                         | 0.3                          | 96.95            | 551.33                    | 16.83                      |
|      | Al    | 125.8                       | 11.15                        | 0.2                          | 91.14            | 629                       | 55.75                      |
|      | Zn    | 7.39                        | 1.31                         | 5                            | 82.27            | 1.478                     | 0.26                       |
|      | Cd    | 1.96                        | 0.011                        | 0.003                        | 99.44            | 653.33                    | 3.67                       |
|      | Pb    | 2.03                        | 0.016                        | 0.01                         | 99.21            | 203                       | 1.6                        |
|      | Ni    | 2.18                        | 0.095                        | 0.07                         | 95.64            | 31.14                     | 1.36                       |
|      |       |                             |                              |                              |                  |                           |                            |

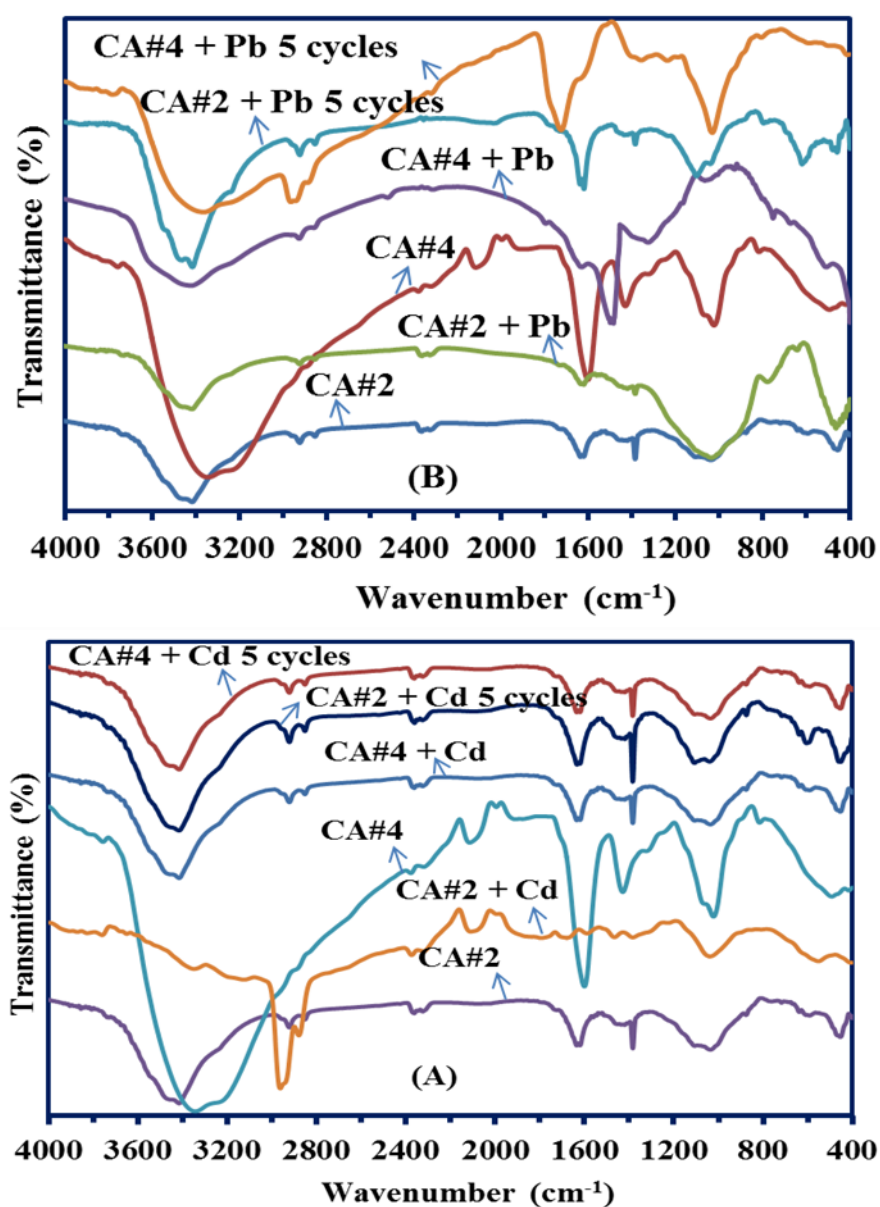

**Figure S1.** FTIR analyses of CA#2 and CA#4 of loaded metal ions (Cd (A) and Pb (B)), after desorption, and after 5 cycles of sorption-desorption.

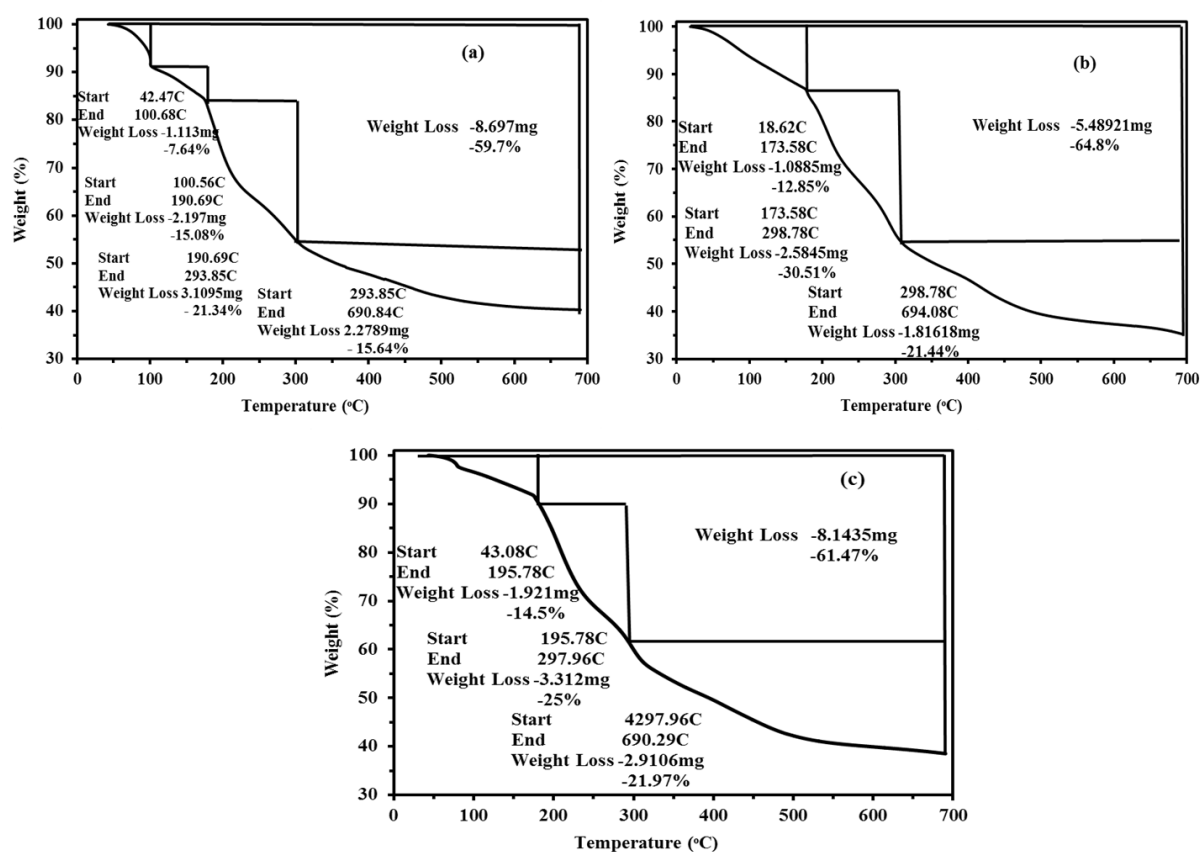

Figure S2a. TGA analysis of CA#2-(a), CA#3-(b), and CA#4-(c) sorbents.

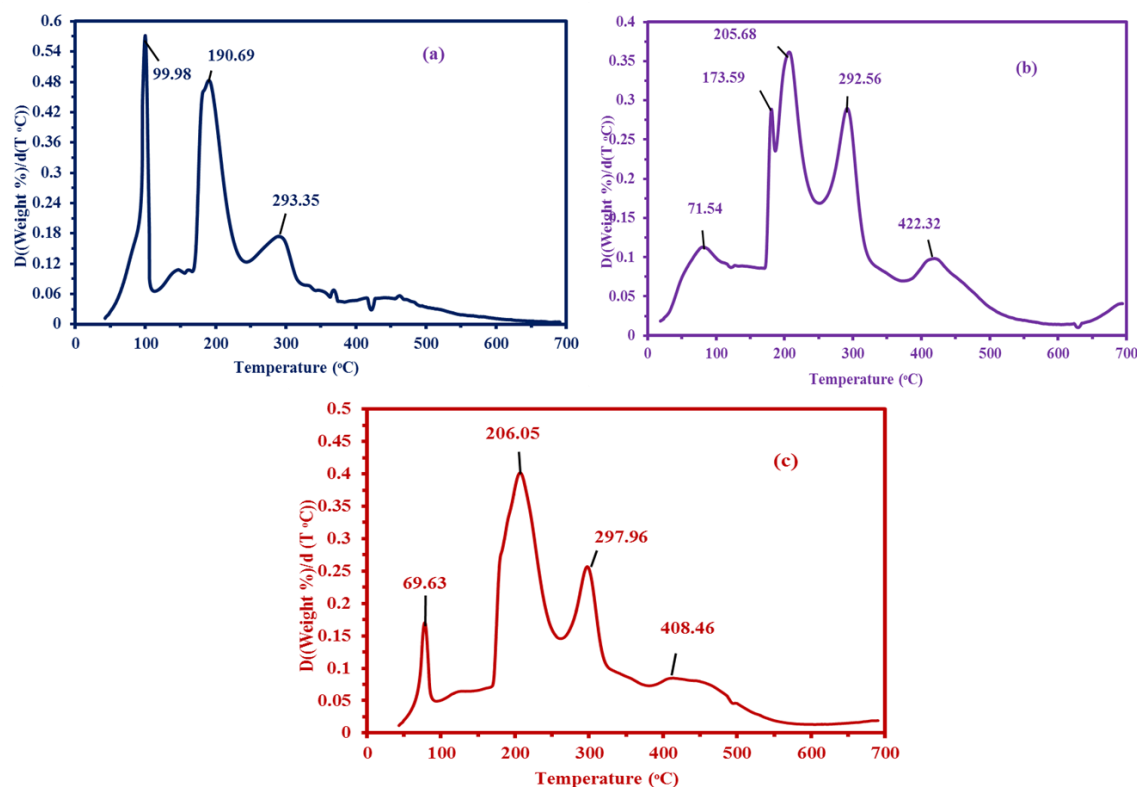

Figure S2b. DTG of the synthesized CA#2-(a), CA#3-(b), and CA#4-(c) sorbents.

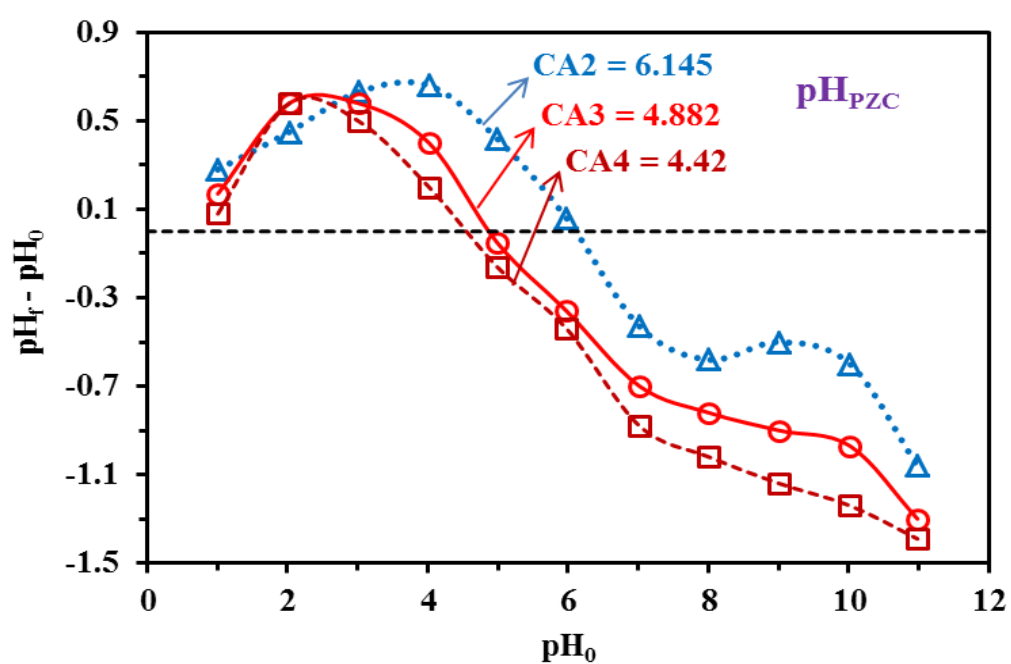

**Figure S3.**  $\text{pH}_{\text{pzc}}$  measurements of CA#2, CA#3, and CA#4 sorbents (SD:  $2 \text{ g L}^{-1}$ ; time of agitation: 48 h; speed,  $170 (\pm 3) \text{ rpm}$ ; T:  $23 (\pm 3) ^\circ\text{C}$ ).



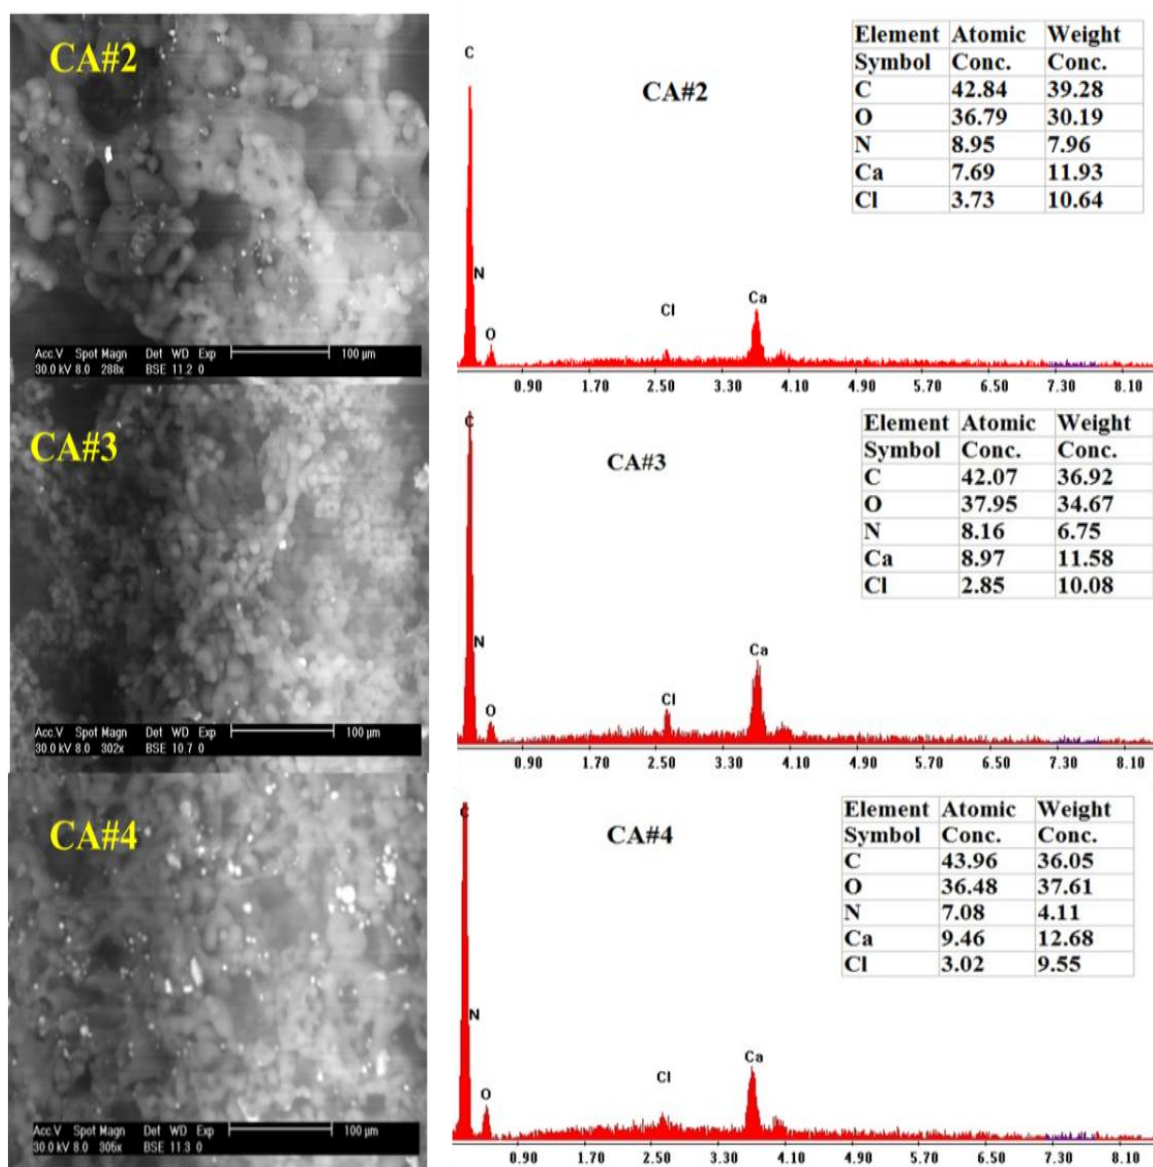

**Figure S4.** SEM and EDX for the semi-quantitative analysis of CA#2, CA#3, and CA#4 sorbents.

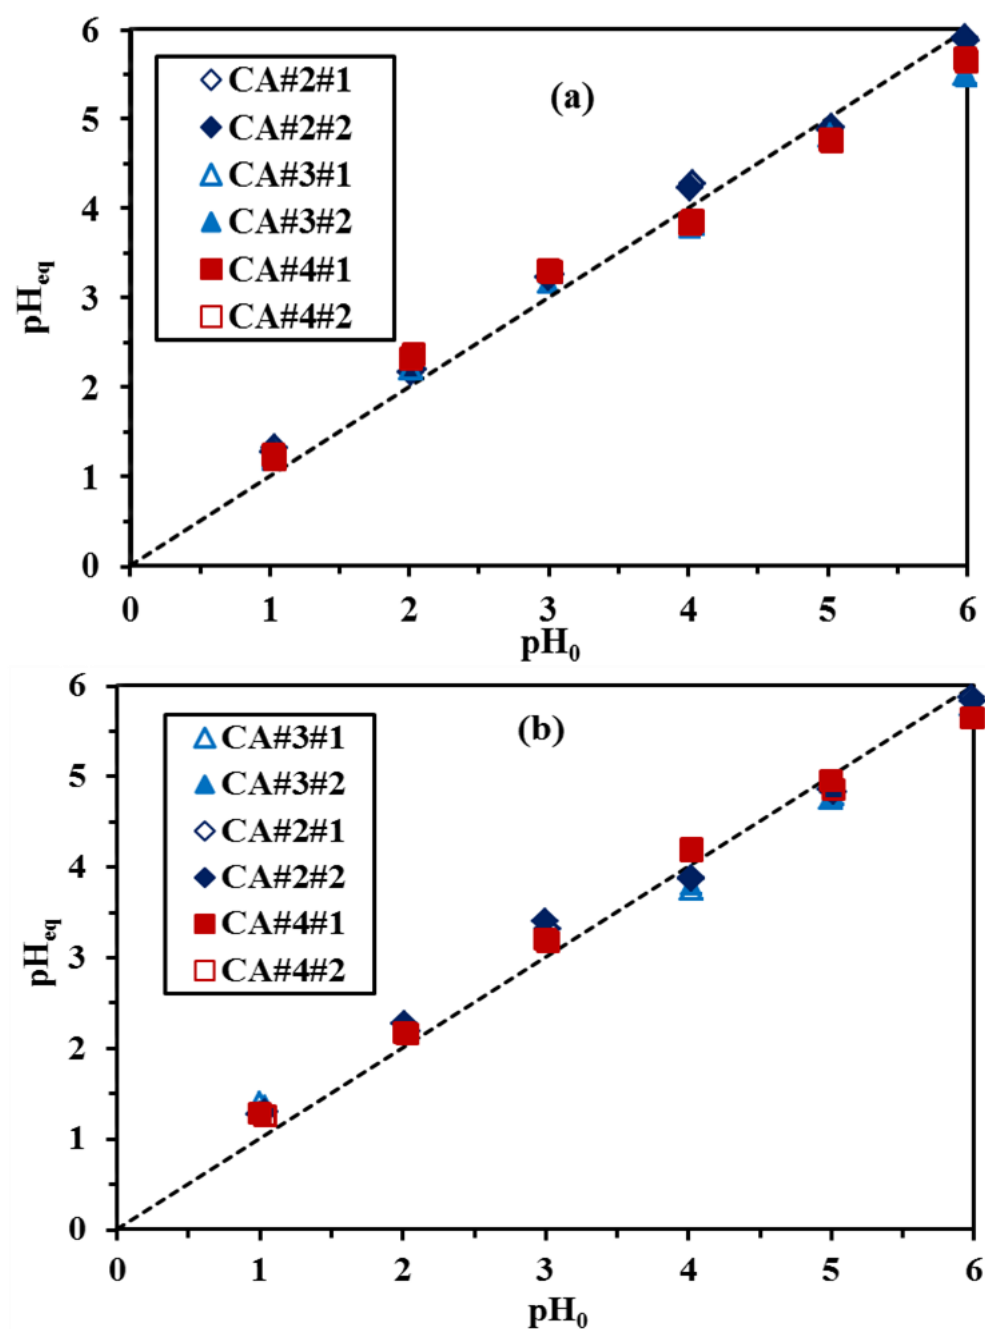

**Figure 5.** pH variation for Cd(II)-(a) and Pb(II)-(b) sorption using CA#2, CA#3, and CA#4 sorbents ( $C_0$ : 0.958 mmol Cd L<sup>-1</sup> for 1<sup>st</sup> Series and 0.967 mmol Cd L<sup>-1</sup>—2<sup>nd</sup> Series,  $C_0$ : 0.48 mmol Pb L<sup>-1</sup> for—1<sup>st</sup> Series and 0.51 mmol Pb L<sup>-1</sup>—2<sup>nd</sup> Series, sorbent dosage, SD: 1 g L<sup>-1</sup>; temperature, T: 23 (±3) °C; time: 48 h; agitation speed: 170 (±3) rpm).

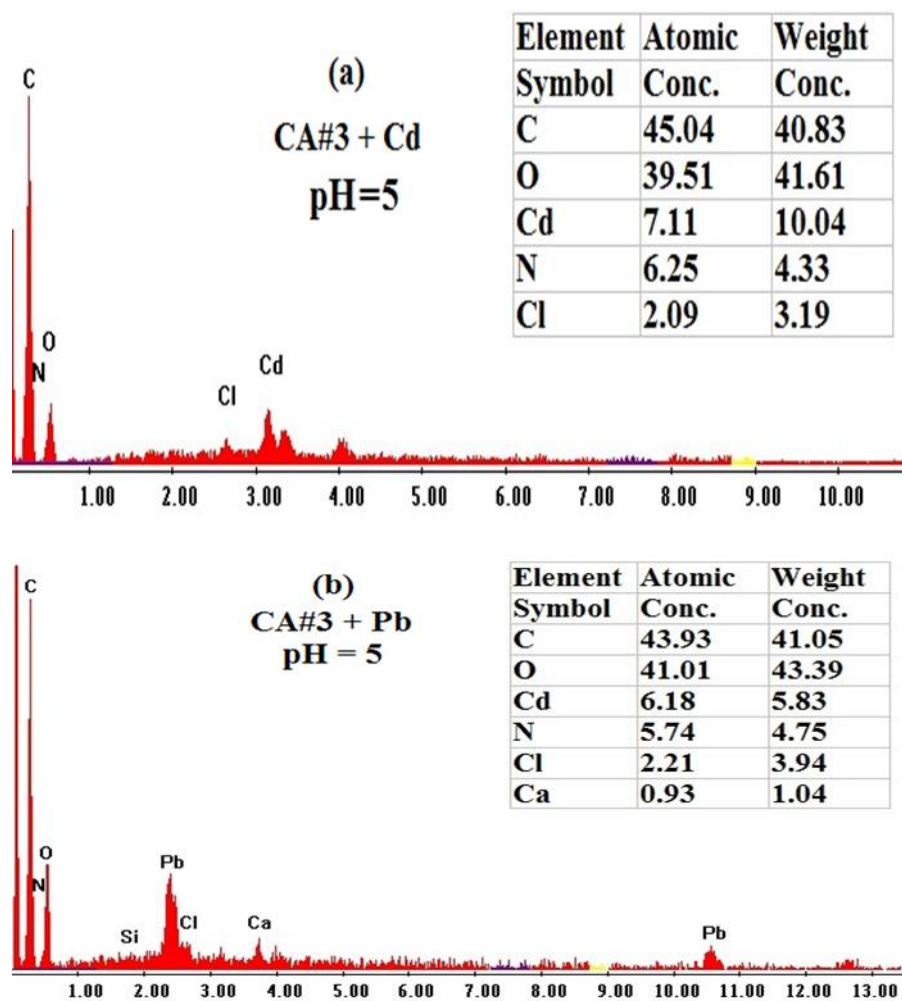

Figure S6. SEM-EDX analysis of sorbent (CA#3) after loading with Cd(II) -(a) and Pb(II) -(b) ions.

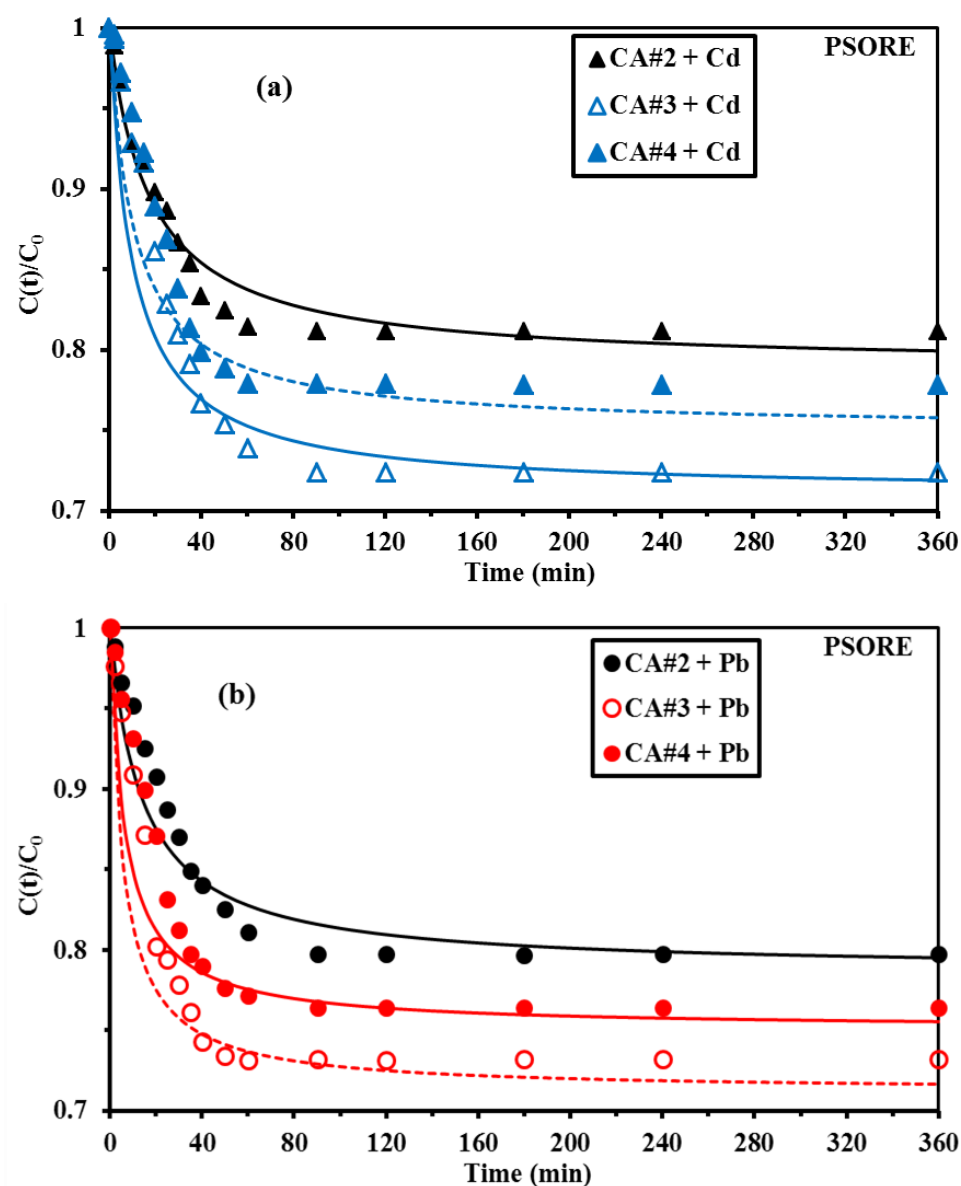

**Figure S7.** Sorption kinetics profile of the PSORE for Cd(II) (a) and Pb(II) (b) ( $C_0$ : 100 ( $\pm 5$ ) mg L<sup>-1</sup>; SD: 250 mg L<sup>-1</sup>, pH: 5).

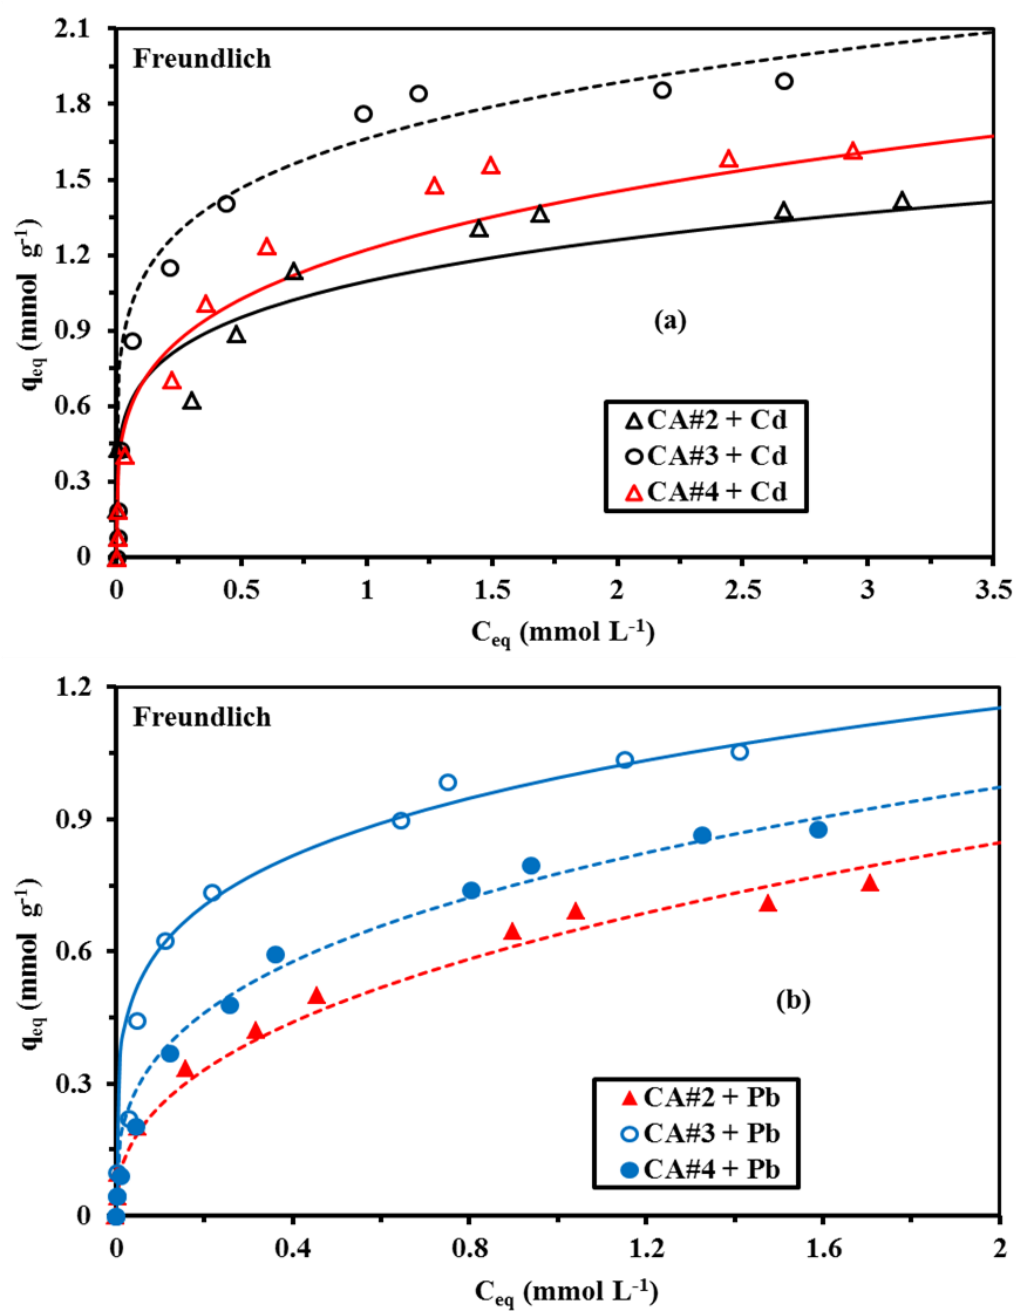

**Figure S8.** Cd (II), (a) and Pb(II), (b) sorption isotherms using CA#2, CA#3, and CA#4—Modeling with Freundlich equation ( $C_0$ : 10–500 mg M L<sup>-1</sup>; SD: 1 g L<sup>-1</sup>; T: 23 (±3) °C; time: 48 h; agitation speed: 170 (±3) rpm).

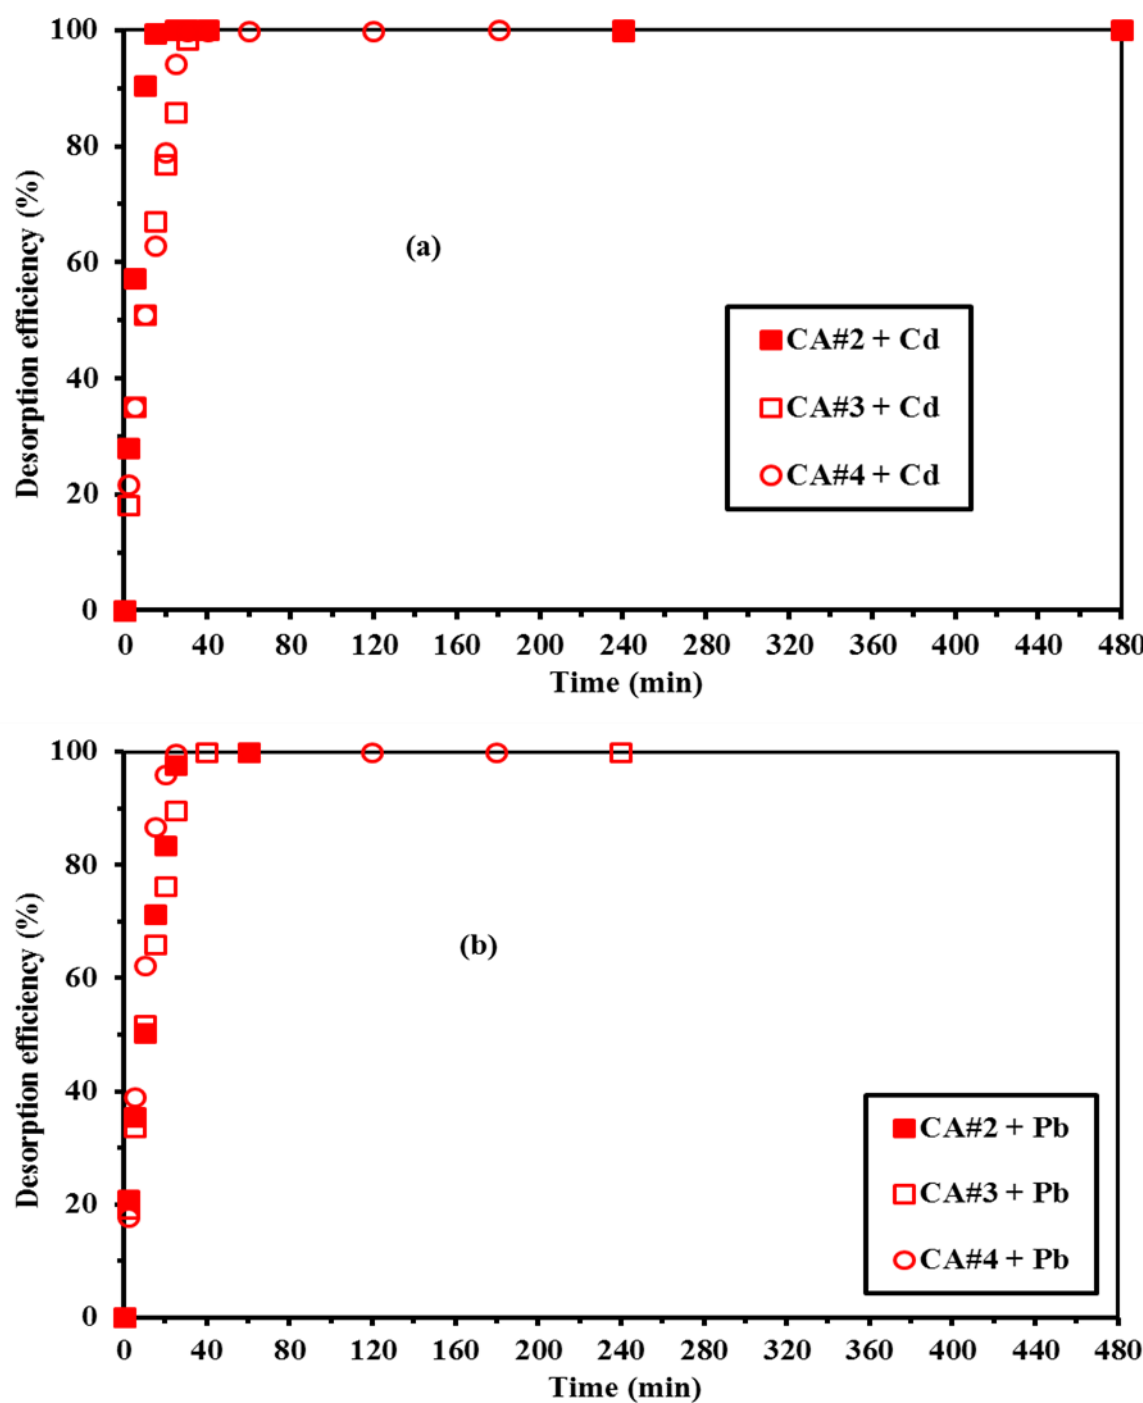

**Figure S9.** Desorption efficiencies for loaded sorbent (from kinetic experiments) for Cd(II) (a) and Pb(II) (b)-using 0.2M HCl (SD: 1 g L<sup>-1</sup>; T: 23 (±3) °C; time: 24 h; agitation speed: 170 (±3) rpm).

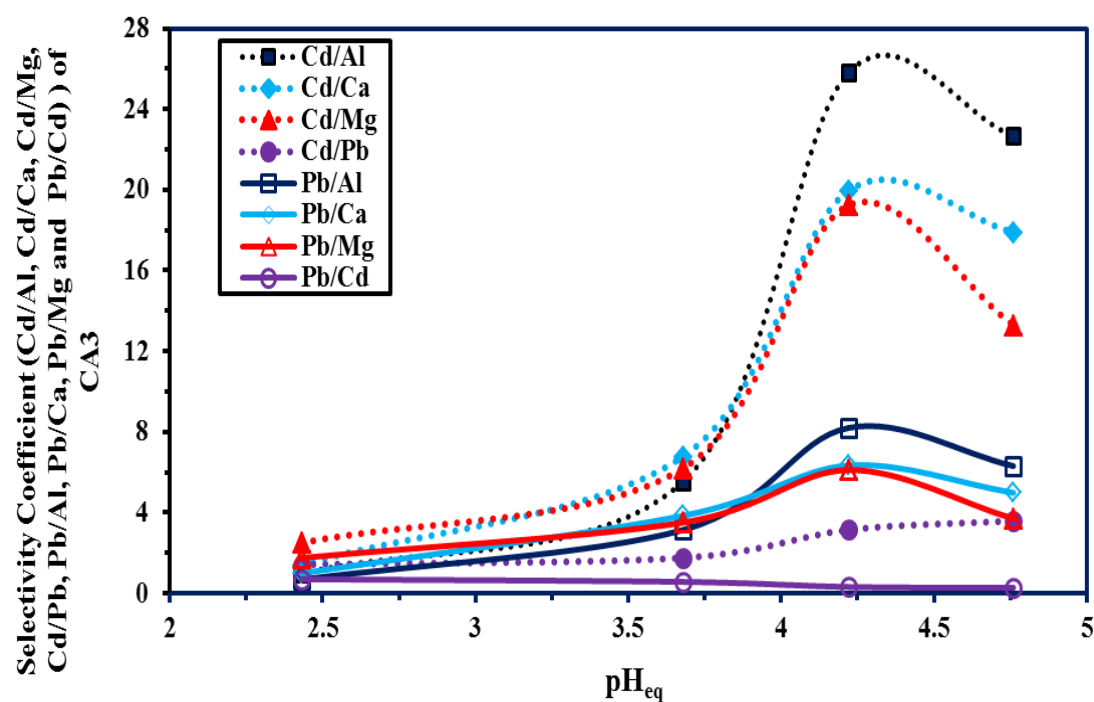

**Figure S10.** Sorption of Cd (solid symbols/dotted lines) and Pb (open symbols/solid lines) comparing to other elements in multi-component of mono, di and trivalent cations (multi-component concentrations;  $C_0$  (M): 1.0 mmol metal  $L^{-1}$ ; SD: 1 g  $L^{-1}$ ; time of agitation: 48 h; speed: 170 ( $\pm 3$ ) rpm; T:  $23 \pm 3$  °C).

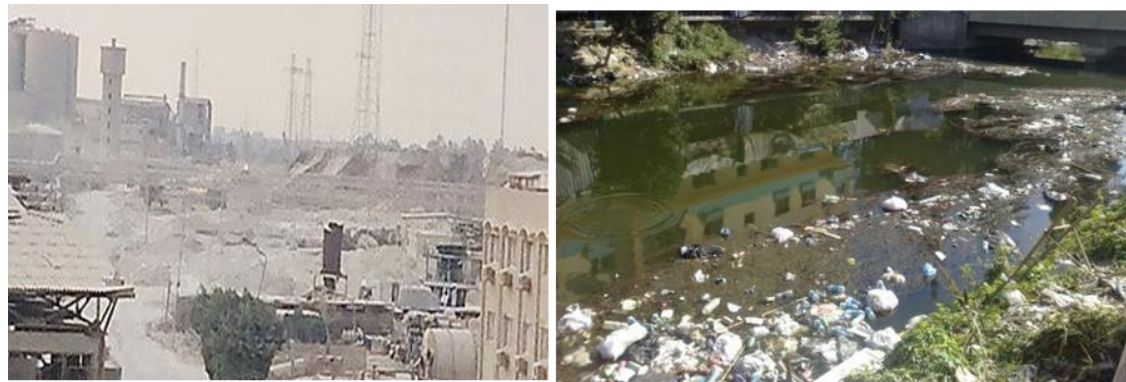

**Figure S11.** Photos of the contaminant industrial areas.

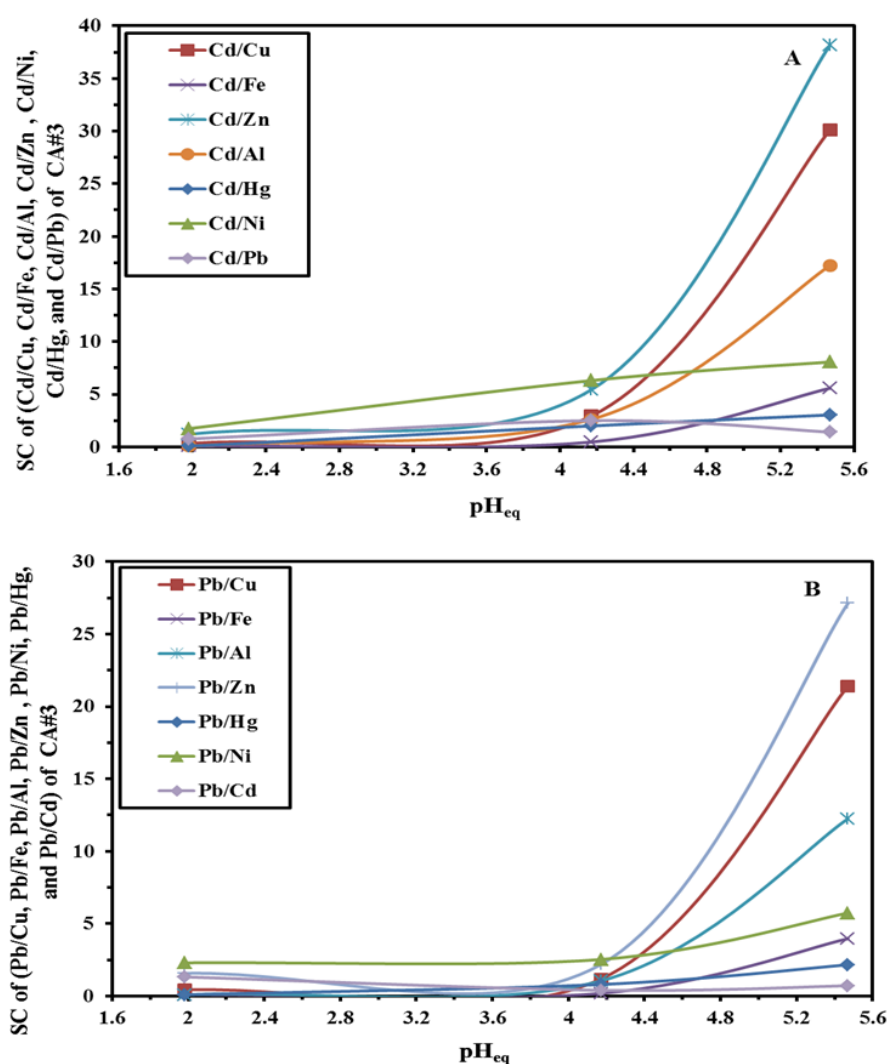

**Figure S12.** Sorption of Cd(II) (A) and Pb(II) (B) in naturally contaminated water at different pH values (SD: 1 g L<sup>-1</sup>; time of agitation: 5 h; speed: 170 (±3) rpm; T: 23 ± 3 °C).

## References

1. EU. Council Directive 98/83/EC of 3 November 1998 on the quality of water intended for human consumption. In *Document 31998L0083*; Union, E., Ed. European Union: Brussels, Belgium, 1998.
2. USEPA. *The Drinking Water Standards and Health Advisories*. Office of Water, U.S. Environmental Protection Agency: Washington, DC, USA, 2021; Volume 822-S-12-001, pp. 1–12.
3. WHO. *Guidelines for drinking-water quality*, 4th ed.; World Health Organization: Geneva, Switzerland, 2011; p. 541.
4. Ho, Y.S.; McKay, G. Pseudo-second order model for sorption processes. *Process Biochem.* **1999**, *34*, 451–465, doi:10.1016/S0032-9592(98)00112-5.
5. Tien, C. *Adsorption Calculations and Modeling*; Butterworth-Heinemann: Newton, MA, 1994; pp. 243.
6. Foo, K.Y.; Hameed, B.H. Insights into the modeling of adsorption isotherm systems. *Chem. Eng. J.* **2010**, *156*, 2–10, doi:10.1016/j.cej.2009.09.013.
7. Falyouna, O.; Eljamal, O.; Maamoun, I.; Tahara, A.; Sugihara, Y. Magnetic zeolite synthesis for efficient removal of cesium in a lab-scale continuous treatment system. *J. Colloid Interface Sci.* **2020**, *571*, 66–79, doi:10.1016/j.jcis.2020.03.028.
8. Alexandratos, S.D.; Zhu, X. The effect of hydrogen bonding in enhancing the ionic affinities of immobilized monoprotic phosphate ligands. *Materials* **2017**, *10*, doi:10.3390/ma10080968.
9. Persson, I. Hydrated metal ions in aqueous solution: How regular are their structures? *Pure Appl. Chem.* **2010**, *82*, 1901–1917, doi:10.1351/pac-con-09-10-22.
10. Sato, H.; Yui, M.; Yoshikawa, H. Ionic diffusion coefficients of Cs<sup>+</sup>, Pb<sup>2+</sup>, Sm<sup>3+</sup>, Ni<sup>2+</sup>, SeO<sub>2</sub><sup>4-</sup> and TcO<sub>4</sub><sup>-</sup> in free water determined from conductivity measurements. *Journal of Nuclear Science and Technology* **1996**, *33*, 950–955.



11. Marcus, Y. *Ion Properties*. Marcel Dekker, Inc.: New York, NY, USA 1997; p. 259.
